# Supplementary material for: A TMA and DSC study of the kinetics of the solid-state reaction in an Al 2 O 3 –Y 2 O 3 system
Source: Royal Society of Chemistry journal article supplement (doi:10.1039/d5cp03930d), 2025-11-28
Supplement: d5cp03930d2.xlsx [file d5cp03930d2.xlsx]

## Sheet: Feuil1
Rampe : 5°C/min	Température (°C)	Température (K)	3% at. Nd:YAG	YAP		Résultats isothermes du 3% at. NdYAG		YAP + Al2O3 --> YAG		(réaction majoritaire)
650°C - 1h (air)	650	923	4.4829	4.5732		Cycle	Masse volumique (g/cm3)	t (h)	%m. YAP	%m. Al2O3	%m. YAG	dth mélange	Taux d'avancement
1000°C - 2h (air)	1000	1273	4.4535	4.5295		1200°C-0h (air)		0	0.829672	0.170328	0	5.09064	0
1100°C - 2h (air)	1100	1373	4.4686	4.523		1200°C-2h (air)	4.8863	2	0.514397	0.105603	0.38	4.88649	0.38
1200°C - 2h (air)	1200	1473	4.8863	5.2466		1200°C-4h (air)	4.7823	4	0.340166	0.0698345	0.59	4.78055	0.59
1300°C - 2h (air)	1300	1573	4.6055	5.2914		1200°C-8h (air)	4.6899	8	0.182528	0.0374722	0.78	4.68857	0.78
1400°C - 2h (air)	1400	1673	4.5832	5.3001		1200°C-16h (air)	4.6267	16	0.0746705	0.0153295	0.91	4.62765	0.91
1500°C - 2h (air)	1500	1773	4.5732	5.3163		1200°C-60h (air)	4.5816	60	0.00829672	0.00170328	0.99	4.59095	0.99
1600°C - 2h (air)	1600	1873	4.4408	5.0468		1200°C-100h (air)	4.5864	100	0.000829672	0.000170328	0.999	4.58685	0.999
ANISOTHERMAL		ρ théorique (g/cm3)	4.5765	5.3463		ISOTHERMAL
											Phase	dth	M (g/mol)
											Al2O3	3.98	101.96
											Y2O3	5.01	225.82
											YAM	4.51	553.6
											YAP	5.35	163.89
											YAG	4.57	593.63
											3% at. NdYAG	4.5864	598.61
											3% at. NdYAP	5.4	165.55
